# Supplementary material
Source: MDPI journal article supplement (https://www.mdpi.com/1999-4907/12/8/1105)
Supplement: s1 [file s1]

**Table S1.** Dates of Sentinel-2 Level-1C products used in the study.

| Case study | Pre-fire date  | Post-fire date |
|------------|----------------|----------------|
| LUC        | 2 July 2019    | 6 August 2019  |
| ISC_1      | 11 August 2019 | 21 August 2019 |
| ISC_2      | 11 August 2019 | 21 August 2019 |
| CAR        | 11 August 2019 | 21 August 2019 |

**Table S2.** Areal percentage of land use per study site.

|                     | LUC  | CAR  | ISC_1 | ISC_2* |
|---------------------|------|------|-------|--------|
| Deciduous Forest    | 64.1 | 9.8  | -     | 6.3    |
| Rangeland           | 32.9 | 46.1 | 36.7  | 9.4    |
| Rangeland with bush | 3.0  | 32.0 | -     | 33.5   |
| Olive Grove         | -    | 12.1 | 63.3  | 39.5   |

\*In ISC\_2 site there is a 11.3% of urban area, which is not considered in the elaborations.

**Table S3.** CN-AMCIII per land use and soil group used for each study site.

|                     | LUC  |      | CAR  |      | ISC_1 |      | ISC_2 |
|---------------------|------|------|------|------|-------|------|-------|
| Soil Group          | B    | D    | A    | A    | C     | A    |       |
| Deciduous Forest    | 77.8 | 89.8 | 56.8 | -    | -     | 56.8 |       |
| Olive Grove         | -    | -    | 82.6 | 82.6 | 93.0  | 82.6 |       |
| Rangeland           | -    | 95   | 83.3 | 83.3 | -     | 69.2 |       |
| Rangeland with bush | -    | 92.5 | 65.7 | -    | -     | -    |       |

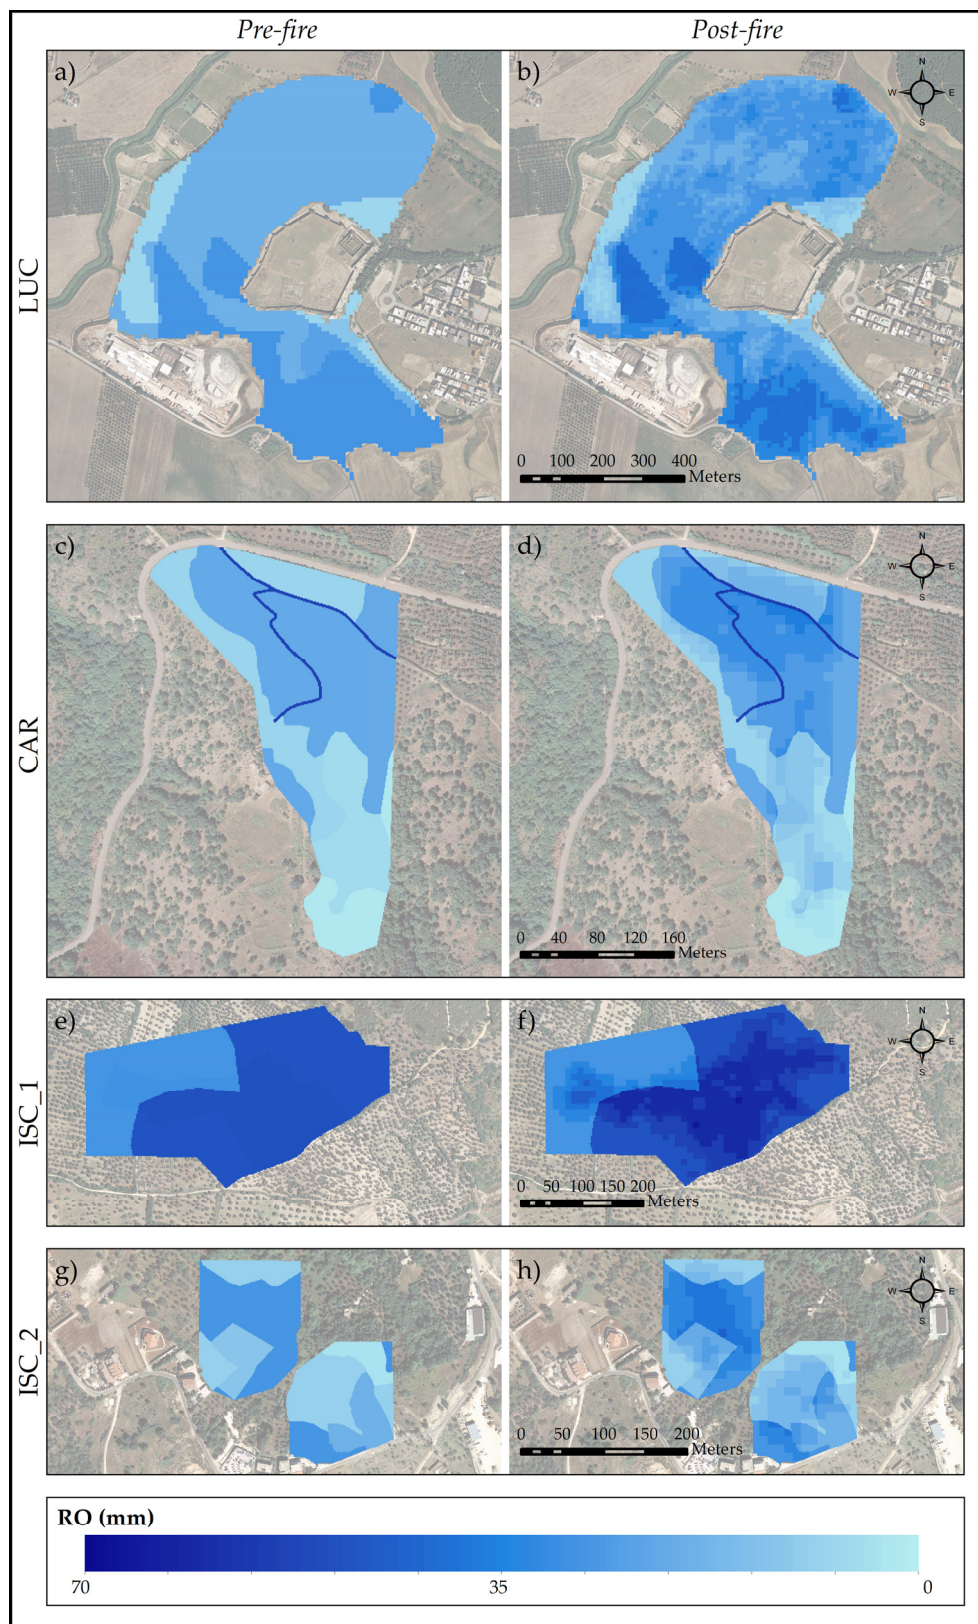

**Figure S1.** Pre- and post-fire runoff values (mm) for each study site: a-b) LUC; c-d) CAR; e-f) ISC\_1; g-h) ISC\_2.
